# Supplementary material for: miRNA and mRNA Expression Profiles Associated with Lymph Node Metastasis and Prognosis in Penile Carcinoma
Source: Int J Mol Sci. 2022 Jun 26;23(13):7103. doi: 10.3390/ijms23137103 (PMC9266734; doi:10.3390/ijms23137103)
Supplement: Supplementary file 1 [file ijms-23-07103-s001.zip › ijms-1768611-supplementary.pdf]

## Supplementary Material

**Table S1.** Taqman® Advanced miRNA Assays of the differentially expressed miRNAs (DEmiRs) selected for validation by qRT-PCR.

| Type                           | DEmiR       | TaqMan® Advanced miRNA Assays |
|--------------------------------|-------------|-------------------------------|
| DEmiRs selected for validation | miR-181c-5p | 477934_mir                    |
|                                | miR-744-5p  | 478200_mir                    |
|                                | miR-196b-5p | 478585_mir                    |
|                                | miR-200a-5p | 478752_mir                    |
|                                | miR-152-3p  | 477921_mir                    |
|                                | miR-421     | 478088_mir                    |
|                                | miR-149-5p  | 477917_mir                    |
| Endogenous controls            | miR-103a-3p | 478253_mir                    |
|                                | miR-423-5p  | 478090_mir                    |

DEmiR: differentially expressed miRNA; qRT-PCR: quantitative Reverse Transcription Polymerase Chain Reaction.

**Table S2.** Complete list of the genes included in the panel (83 genes of interest and seven endogenous controls) used to evaluate transcript expression levels in the total sample of penile cancer patients (n=24).

| Gene symbol    | Gene Name                                                    | Classification     |
|----------------|--------------------------------------------------------------|--------------------|
| <i>ABCB1</i>   | <i>ATP binding cassette subfamily B member 1</i>             | Gene of interest   |
| <i>ACTB</i>    | <i>Actin Beta</i>                                            | Endogenous control |
| <i>AKT1</i>    | <i>AKT serine/threonine kinase 1</i>                         | Gene of interest   |
| <i>ALDH1A1</i> | <i>aldehyde dehydrogenase 1 family member A1</i>             | Gene of interest   |
| <i>ATM</i>     | <i>ATM serine/threonine kinase</i>                           | Gene of interest   |
| <i>B2M</i>     | <i>Beta-2-Microglobulin</i>                                  | Endogenous control |
| <i>BAX</i>     | <i>BCL2 associated X, apoptosis regulator</i>                | Gene of interest   |
| <i>BBC3</i>    | <i>BCL2 binding component 3</i>                              | Gene of interest   |
| <i>BCL2</i>    | <i>BCL2, apoptosis regulator</i>                             | Gene of interest   |
| <i>CCND1</i>   | <i>cyclin D1</i>                                             | Gene of interest   |
| <i>CD274</i>   | <i>CD274 molecule</i>                                        | Gene of interest   |
| <i>CD44</i>    | <i>CD44 molecule (Indian blood group)</i>                    | Gene of interest   |
| <i>CDH1</i>    | <i>cadherin 1</i>                                            | Gene of interest   |
| <i>CDH2</i>    | <i>cadherin 2</i>                                            | Gene of interest   |
| <i>CDKN1A</i>  | <i>cyclin dependent kinase inhibitor 1A</i>                  | Gene of interest   |
| <i>CDKN2A</i>  | <i>cyclin dependent kinase inhibitor 2A</i>                  | Gene of interest   |
| <i>CEBPB</i>   | <i>CCAAT/enhancer binding protein beta</i>                   | Gene of interest   |
| <i>CXCR4</i>   | <i>C-X-C motif chemokine receptor 4</i>                      | Gene of interest   |
| <i>DKK1</i>    | <i>dickkopf WNT signaling pathway inhibitor 1</i>            | Gene of interest   |
| <i>DNMT1</i>   | <i>DNA methyltransferase 1</i>                               | Gene of interest   |
| <i>EGFR</i>    | <i>epidermal growth factor receptor</i>                      | Gene of interest   |
| <i>EGR1</i>    | <i>early growth response 1</i>                               | Gene of interest   |
| <i>ENTPD5</i>  | <i>ectonucleoside triphosphate diphosphohydrolase 5</i>      | Gene of interest   |
| <i>ESRP1</i>   | <i>epithelial splicing regulatory protein 1</i>              | Gene of interest   |
| <i>FGF2</i>    | <i>fibroblast growth factor 2</i>                            | Gene of interest   |
| <i>FOS</i>     | <i>Fos proto-oncogene, AP-1 transcription factor subunit</i> | Gene of interest   |
| <i>GADD45A</i> | <i>growth arrest and DNA damage inducible alpha</i>          | Gene of interest   |
| <i>GAPDH</i>   | <i>Glyceraldehyde-3-Phosphate Dehydrogenase</i>              | Endogenous control |
| <i>GUSB</i>    | <i>Glucuronidase Beta</i>                                    | Endogenous control |
| <i>HIF1A</i>   | <i>hypoxia inducible factor 1 alpha subunit</i>              | Gene of interest   |
| <i>HOXA10</i>  | <i>homeobox A10</i>                                          | Gene of interest   |
| <i>HOXA9</i>   | <i>homeobox A9</i>                                           | Gene of interest   |
| <i>HPRT1</i>   | <i>Hypoxanthine Phosphoribosyltransferase 1</i>              | Endogenous control |
| <i>IGF1R</i>   | <i>insulin-like growth factor 1 receptor</i>                 | Gene of interest   |

|          |                                                                   |                    |
|----------|-------------------------------------------------------------------|--------------------|
| IL1A     | <i>interleukin 1 alpha</i>                                        | Gene of interest   |
| IL1B     | <i>interleukin 1 beta</i>                                         | Gene of interest   |
| IL6      | <i>interleukin 6</i>                                              | Gene of interest   |
| JUN      | <i>Jun proto-oncogene, AP-1 transcription factor subunit</i>      | Gene of interest   |
| KAT6A    | <i>lysine acetyltransferase 6A</i>                                | Gene of interest   |
| KLF4     | <i>Kruppel like factor 4</i>                                      | Gene of interest   |
| KMT2A    | <i>lysine methyltransferase 2A</i>                                | Gene of interest   |
| KMT2D    | <i>lysine methyltransferase 2D</i>                                | Gene of interest   |
| KRAS     | <i>KRAS proto-oncogene, GTPase</i>                                | Gene of interest   |
| LATS2    | <i>large tumor suppressor kinase 2</i>                            | Gene of interest   |
| LIN28A   | <i>lin-28 homolog A</i>                                           | Gene of interest   |
| MCM2     | <i>minichromosome maintenance complex component 2</i>             | Gene of interest   |
| MDM2     | <i>MDM2 proto-oncogene</i>                                        | Gene of interest   |
| MLH1     | <i>mutL homolog 1</i>                                             | Gene of interest   |
| MMP1     | <i>matrix metalloproteinase 1</i>                                 | Gene of interest   |
| MMP12    | <i>matrix metalloproteinase 12</i>                                | Gene of interest   |
| MMP9     | <i>matrix metalloproteinase 9</i>                                 | Gene of interest   |
| MYC      | <i>v-myc avian myelocytomatosis viral oncogene homolog</i>        | Gene of interest   |
| MYD88    | <i>myeloid differentiation primary response 88</i>                | Gene of interest   |
| NANOG    | <i>Nanog homeobox</i>                                             | Gene of interest   |
| NES      | <i>nestin</i>                                                     | Gene of interest   |
| NOTCH1   | <i>notch 1</i>                                                    | Gene of interest   |
| NOTCH4   | <i>notch 4</i>                                                    | Gene of interest   |
| NRP1     | <i>neuropilin 1</i>                                               | Gene of interest   |
| PEBP1    | <i>phosphatidylethanolamine binding protein 1</i>                 | Gene of interest   |
| PITX2    | <i>paired like homeodomain 2</i>                                  | Gene of interest   |
| PMAIP1   | <i>phorbol-12-myristate-13-acetate-induced protein 1</i>          | Gene of interest   |
| PPARGC1A | <i>PPARG coactivator 1 alpha</i>                                  | Gene of interest   |
| PTEN     | <i>phosphatase and tensin homolog</i>                             | Gene of interest   |
| Rb1      | <i>RB transcriptional corepressor 1</i>                           | Gene of interest   |
| RECK     | <i>reversion inducing cysteine rich protein with kazal motifs</i> | Gene of interest   |
| RHOA     | <i>ras homolog family member A</i>                                | Gene of interest   |
| RIPK3    | <i>receptor interacting serine/threonine kinase 3</i>             | Gene of interest   |
| RPLP0    | <i>Ribosomal Protein Lateral Stalk Subunit P0</i>                 | Endogenous control |
| SAV1     | <i>salvador family WW domain containing protein 1</i>             | Gene of interest   |
| SESN2    | <i>sestrin 2</i>                                                  | Gene of interest   |
| SFN      | <i>stratifin</i>                                                  | Gene of interest   |
| SNAI1    | <i>snail family transcriptional repressor 1</i>                   | Gene of interest   |
| SNAI2    | <i>snail family transcriptional repressor 2</i>                   | Gene of interest   |

|          |                                                           |                    |
|----------|-----------------------------------------------------------|--------------------|
| SOX2     | <i>SRY-box 2</i>                                          | Gene of interest   |
| SRC      | <i>SRC proto-oncogene, non-receptor tyrosine kinase</i>   | Gene of interest   |
| STAT3    | <i>signal transducer and activator of transcription 3</i> | Gene of interest   |
| STK4     | <i>serine/threonine kinase 4</i>                          | Gene of interest   |
| TCF7L2   | <i>transcription factor 7like 2</i>                       | Gene of interest   |
| TFRC     | <i>Transferrin Receptor</i>                               | Endogenous control |
| TGFB1    | <i>transforming growth factor beta 1</i>                  | Gene of interest   |
| TIGAR    | <i>TP53 induced glycolysis regulatory phosphatase</i>     | Gene of interest   |
| TLR4     | <i>toll-like receptor 4</i>                               | Gene of interest   |
| TNFRSF1A | <i>TNF receptor superfamily member 1A</i>                 | Gene of interest   |
| TP53     | <i>tumor protein p53</i>                                  | Gene of interest   |
| TP53I3   | <i>tumor protein p53 inducible protein 3</i>              | Gene of interest   |
| TP63     | <i>tumor protein p63</i>                                  | Gene of interest   |
| TWIST1   | <i>twist family bHLH transcription factor 1</i>           | Gene of interest   |
| VEGFA    | <i>vascular endothelial growth factor A</i>               | Gene of interest   |
| WNT5a    | <i>Wnt family member 5A</i>                               | Gene of interest   |
| ZEB1     | <i>zinc finger E-box binding homeobox 1</i>               | Gene of interest   |

---

**Table S3.** Total number of PeC patients included in the study and reasons for the exclusion of 17 patients.

| <b>Patients of the study</b>                 | <b><i>n</i></b> |
|----------------------------------------------|-----------------|
| Number of PeC patients at ICESP              | 41              |
| Exclusion criteria of patients               | 17              |
| Patient refused to sign the informed consent | 2               |
| Patient refused penectomy                    | 1               |
| Death before treatment                       | 3               |
| Advanced disease                             | 2               |
| Previous treatment for PeC                   | 1               |
| HIV or HCV infection                         | 2               |
| Penectomy performed in another Hospital      | 2               |
| Insufficient material                        | 3               |
| Lost to follow-up                            | 1               |
| Total number of included patients            | 24              |

*n*: number of patients; ICESP: Instituto do Câncer do Estado de São Paulo; PeC: penile carcinoma; HIV: human immunodeficiency virus; HCV: hepatitis C virus.

**Table S4.** Complete list of the 21 DEmiRs identified by microarray analysis when comparing tumors of patients with metastatic ( $n=6$ ) in relation to those with localized ( $n=5$ ) disease.

| Regulation     | DEmiR        | Fold Change | p      |
|----------------|--------------|-------------|--------|
| Downregulation | miR-7641     | 0.38        | 0.0274 |
|                | miR-4443     | 0.50        | 0.0462 |
|                | miR-1293     | 0.50        | 0.0478 |
|                | miR-181c-5p  | 0.63        | 0.0314 |
|                | miR-5100     | 0.63        | 0.0010 |
| Upregulation   | miR-1296-5p  | 1.59        | 0.0067 |
|                | miR-877-5p   | 1.60        | 0.0364 |
|                | miR-4446-3p  | 1.62        | 0.0110 |
|                | miR-1307-3p  | 1.63        | 0.0013 |
|                | miR-744-5p   | 1.65        | 0.0010 |
|                | miR-196b-5p  | 1.66        | 0.0245 |
|                | miR-4428     | 1.70        | 0.0262 |
|                | miR-1910-5p  | 1.70        | 0.0335 |
|                | miR-2110     | 1.72        | 0.0406 |
|                | miR-6769a-5p | 1.73        | 0.0022 |
|                | miR-7152-3p  | 1.77        | 0.0313 |
|                | miR-6750-5p  | 1.91        | 0.0040 |
|                | miR-200a-5p  | 2.10        | 0.0470 |
|                | miR-152-3p   | 2.60        | 0.0325 |
|                | miR-421      | 2.89        | 0.0005 |
|                | miR-149-5p   | 6.30        | 0.0022 |

$n$ : number of individuals; DEmiR: differentially expressed miRNA;  $p < 0.05$ .

**Table S5.** Cancer-specific and overall survival by clinicopathological features.

| Survival                 | Clinicopathological Variables              | p log-rank | HR (95% CI)          | p     |
|--------------------------|--------------------------------------------|------------|----------------------|-------|
| Cancer-specific survival | Lymph node metastasis (yes <i>vs</i> no)   | 0.003*     | 86.59 (0.18-41340.9) | 0.156 |
|                          | Perineural Invasion (yes <i>vs</i> no)     | 0.043*     | 4.71 (0.90-24.49)    | 0.066 |
|                          | Lymphovascular Invasion (yes <i>vs</i> no) | 0.240      | 2.40 (0.53-10.78)    | 0.255 |
|                          | pT stage (T2+T3 <i>vs</i> T1)              | 0.183      | 28.64 (0.01-80176.9) | 0.407 |
|                          | Histological Grade (III <i>vs</i> I+II)    | 0.161      | 2.81 (0.62-12.68)    | 0.179 |
|                          | HPV infection (presence <i>vs</i> absence) | 0.276      | 0.33 (0.04-2.72)     | 0.301 |
|                          | Tumor Size (> 5cm <i>vs</i> ≤ 5cm)         | 0.635      | 1.43 (0.32-6.41)     | 0.637 |
| Overall survival         | Lymph node metastasis (yes <i>vs</i> no)   | 0.062      | 3.45 (0.87-13.69)    | 0.078 |
|                          | Perineural Invasion (yes <i>vs</i> no)     | 0.326      | 1.85 (0.53-6.45)     | 0.333 |
|                          | Lymphovascular Invasion (yes <i>vs</i> no) | 0.554      | 1.51 (0.38-5.90)     | 0.557 |
|                          | pT stage (T2+T3 <i>vs</i> T1)              | 0.409      | 2.33 (0.30-18.45)    | 0.422 |
|                          | Histological Grade (III <i>vs</i> I+II)    | 0.468      | 1.61 (0.44-5.83)     | 0.471 |
|                          | HPV infection (presence <i>vs</i> absence) | 0.349      | 0.48 (0.10-2.28)     | 0.359 |
|                          | Tumor Size (> 5cm <i>vs</i> ≤ 5cm)         | 0.737      | 1.24 (0.35-4.42)     | 0.737 |

HR: Hazard Ratio; 95% CI: 95% Confidence Interval; \* p &lt;0.05.

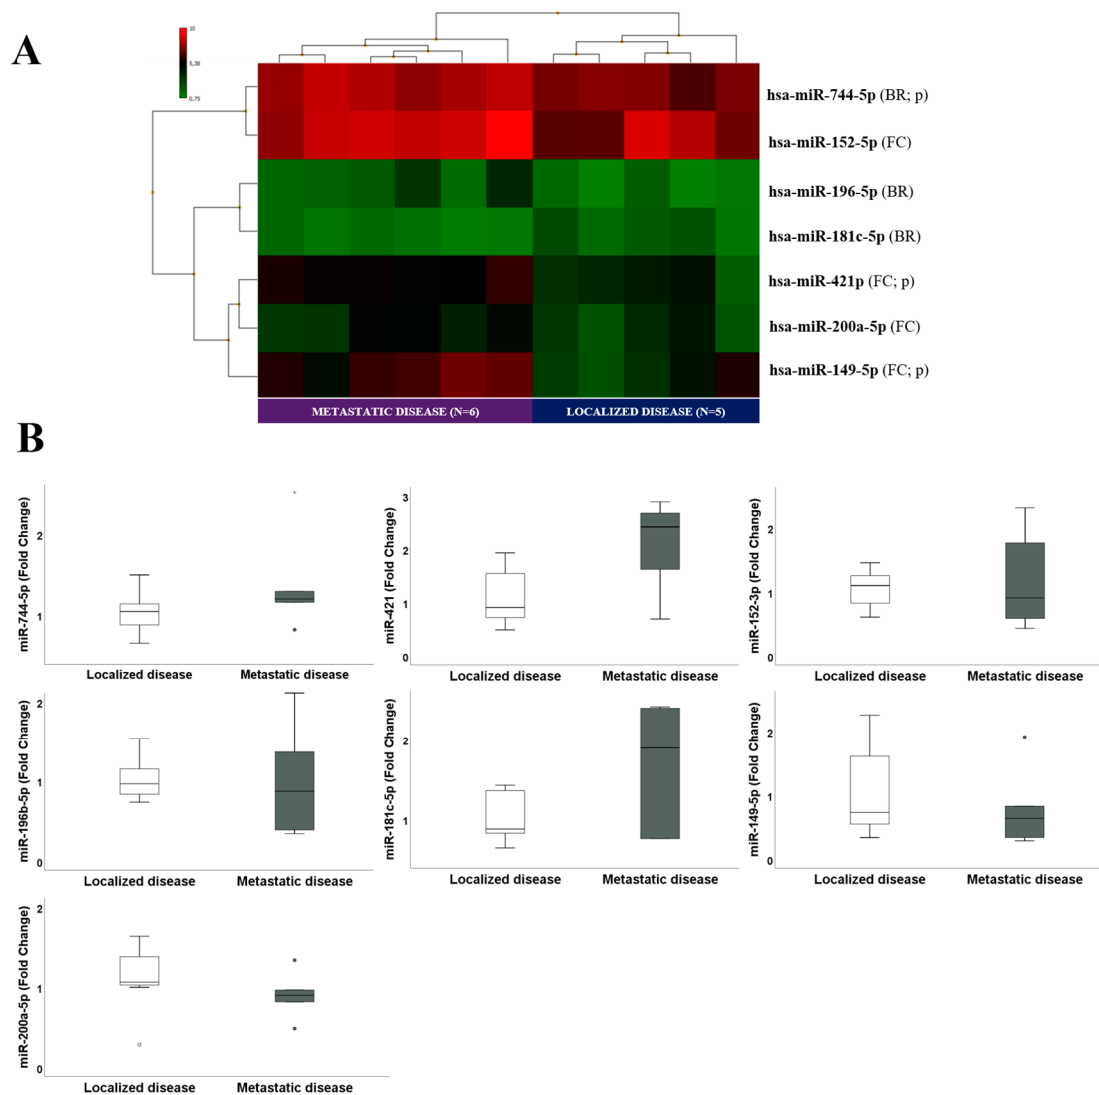

**Figure S1.** Differentially expressed miRNAs (DEmiRs) identified when comparing tumors of PeC patients with metastatic ( $n=6$ ) in relation to localized disease ( $n=5$ ) by microarray analysis and selected for validation in the independent cohort of PeC patients ( $n=13$ ). (A) Hierarchical clustering analysis shows that the seven DEmiRs chosen for validation were able to cluster PeC samples according to lymph node metastasis. The reason for the selection of each DEmiR is indicated in parenthesis (FC: fold change; p: p-value and BR: Biological Relevance); (B) The boxplots show the comparison of the expression levels of the seven selected DEmiRs by qRT-PCR in tumors from patients with metastatic ( $n=6$ ) in relation to localized disease ( $n=7$ ) in the independent validation set of samples ( $n=13$ ); PeC: penile cancer; qRT-PCR: quantitative Reverse Transcription Polymerase Chain Reaction.

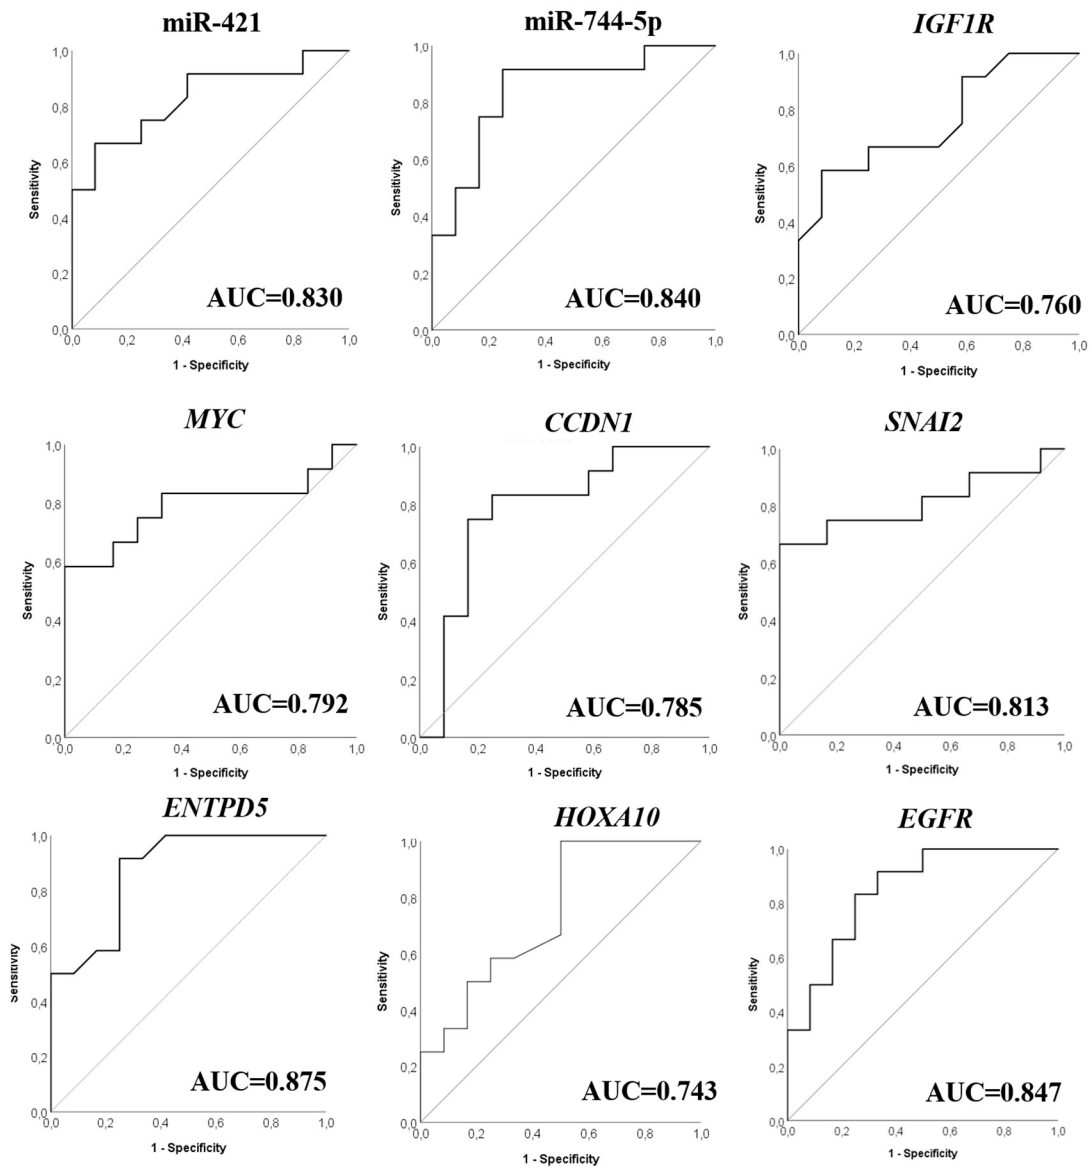

**Figure S2.** ROC curves of differentially expressed miRNAs (DEmiRs) and differentially expressed genes (DEGs) detected when comparing tumors of patients with metastatic and localized disease in the total sample of penile cancer patients ( $n=24$ ), showing that they have good accuracy in differentiating these two groups; ROC: receiver operating characteristic; AUC: area under the curve.

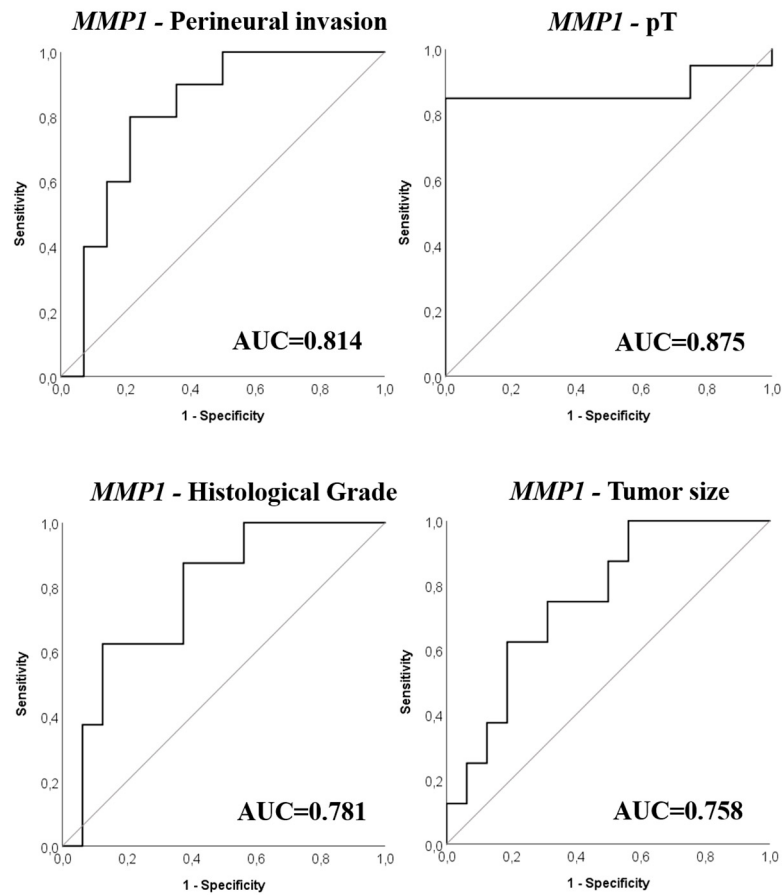

**Figure S3.** *MMP1* expression level is a good predictor of perineural invasion, worse pT stage (T2+T3), higher histological grade (III), and larger tumor size (> 5cm); AUC: area under the curve.

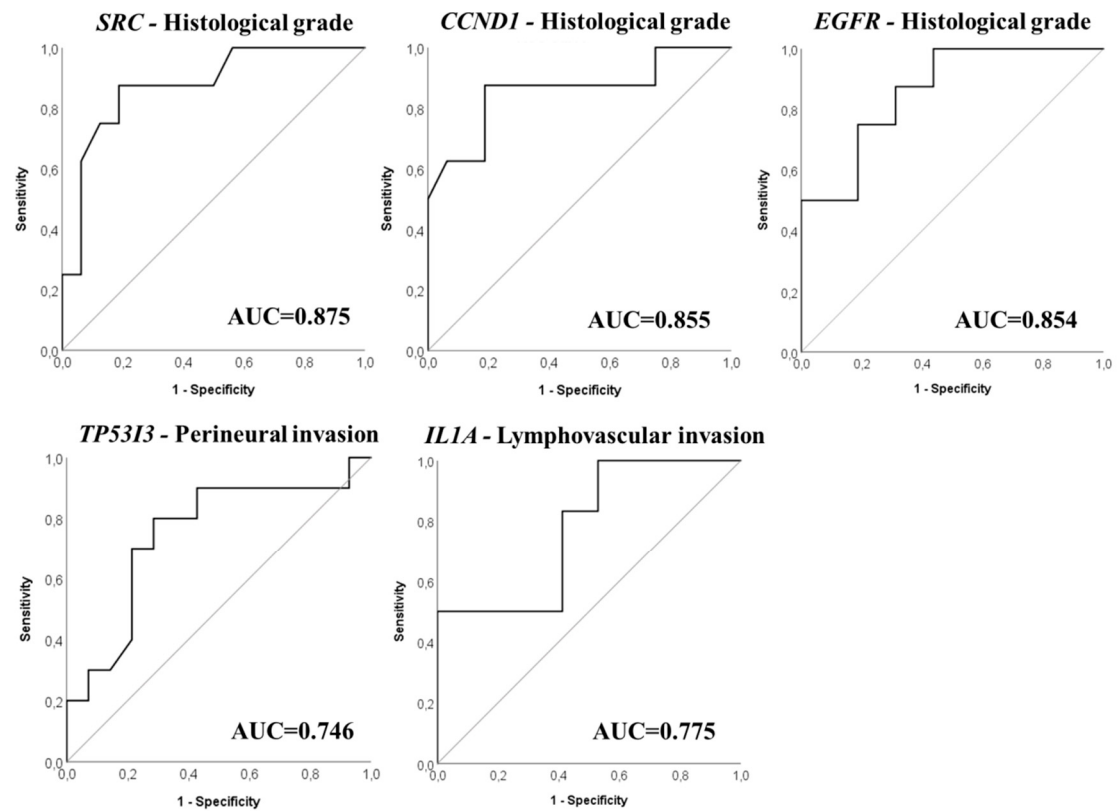

**Figure S4.** Receiver Operating Characteristic (ROC) curve analysis of mRNA expression levels and specific histopathological features; AUC: area under the curve.

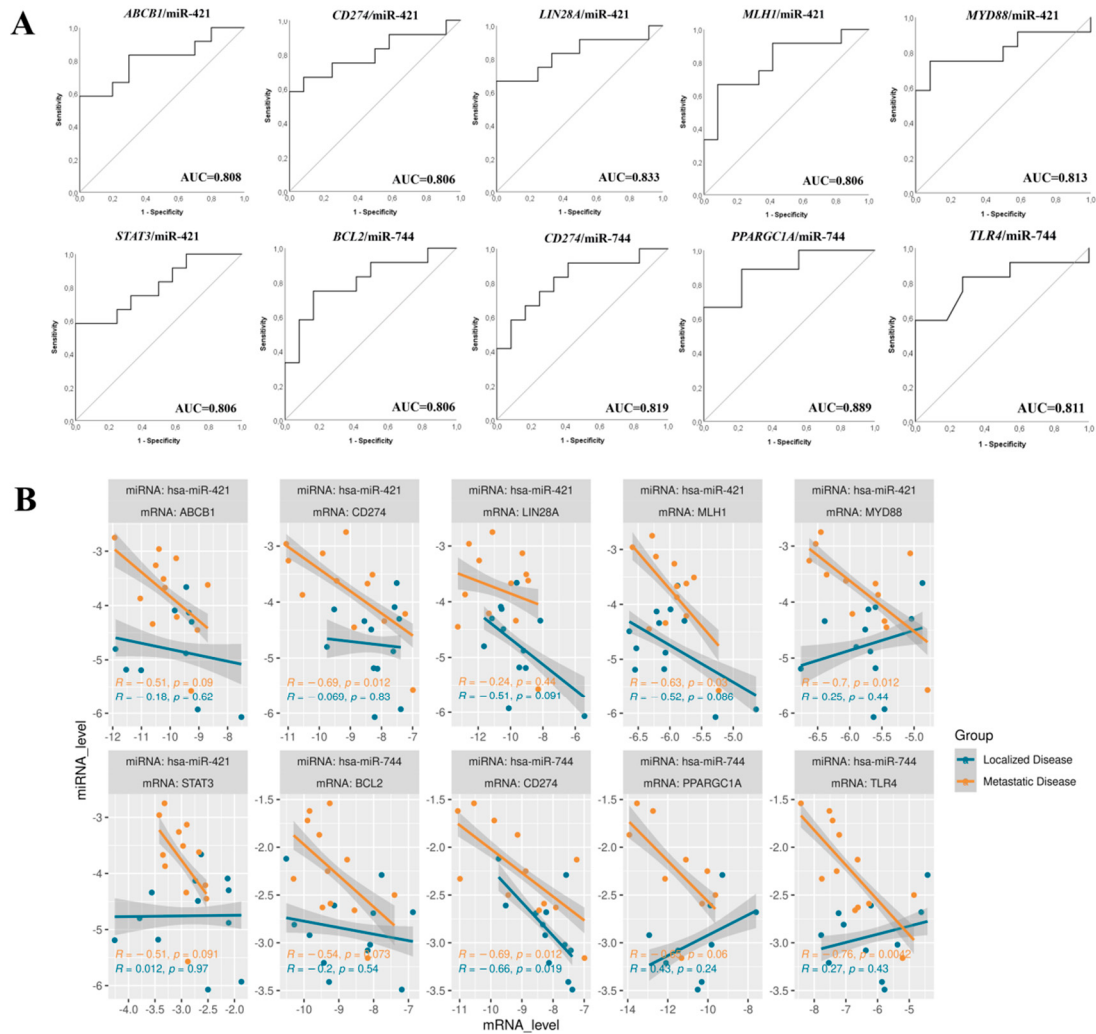

**Figure S5.** Ten mRNA-miRNA pair-wise ratios are proposed as candidates for prognosis biomarkers in Penile Cancer. (A) ROC curve analysis of mRNA-miRNA expression level ratios with good accuracy ( $AUC > 0.80$ ) for discriminating between tumors of patients with metastatic ( $n=12$ ) and localized diseases ( $n=12$ ). (B) mRNA and miRNA expression values of tumors of patients with metastatic and localized diseases were plotted for the ten miRNA-mRNA pairs. For each graph, the R coefficient and p values of the Pearson correlation test are indicated at the bottom. ROC: receiver operating characteristic; AUC: area under the curve.

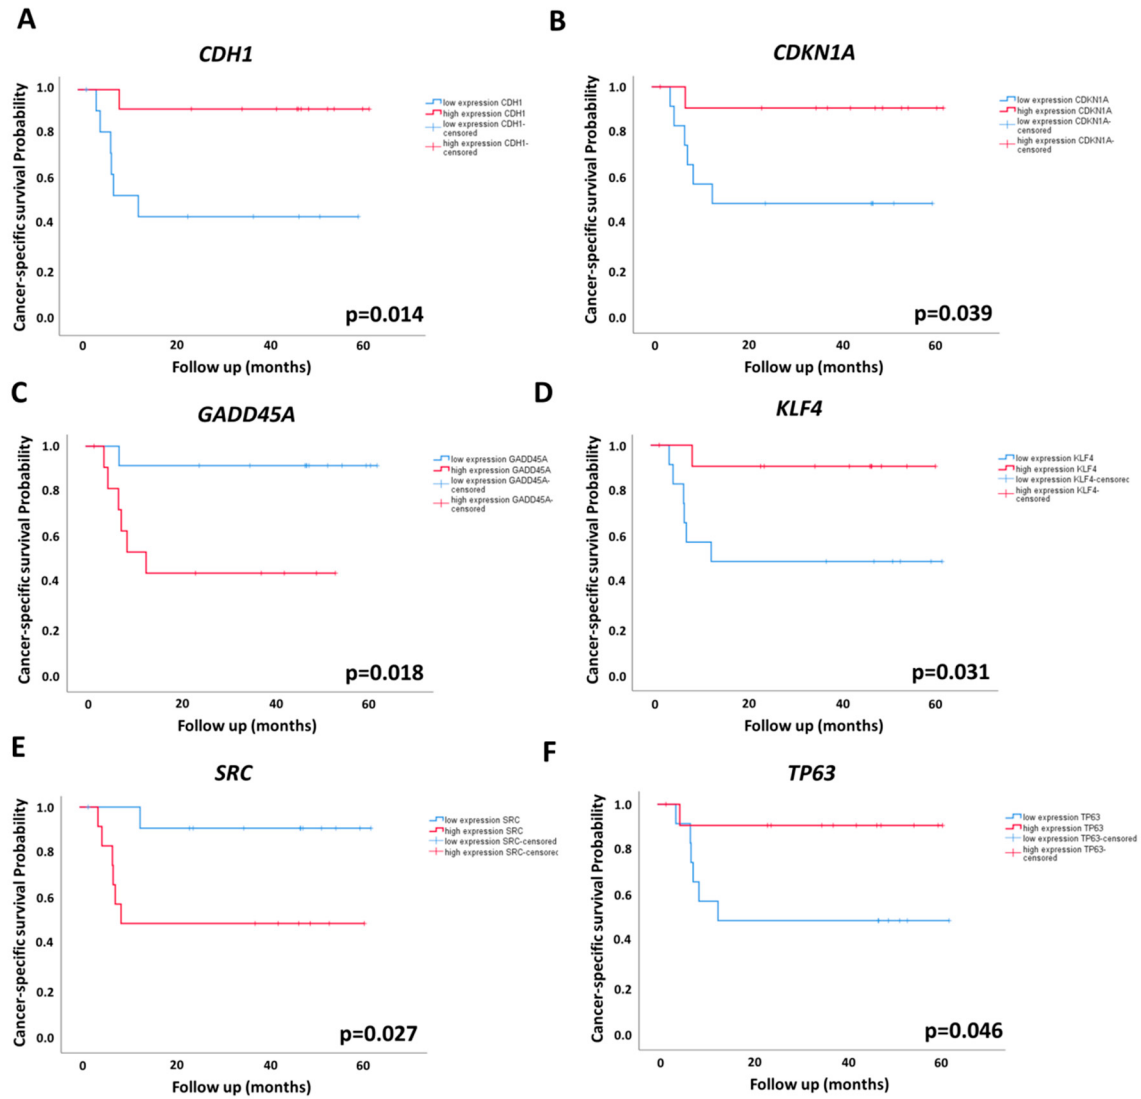

**Figure S6.** Cancer-specific survival (CSS) analyses of penile cancer patients according to gene expression patterns. Kaplan-Meier curves show that low expression (defined as values above the -dCT median expression) of *CDH1* (A), *CDKN1A* (B), *KLF4* (D), and *TP63* (F) and high expression levels of *GADD45A* (C) and *SRC* (E) were associated with shorter CSS.

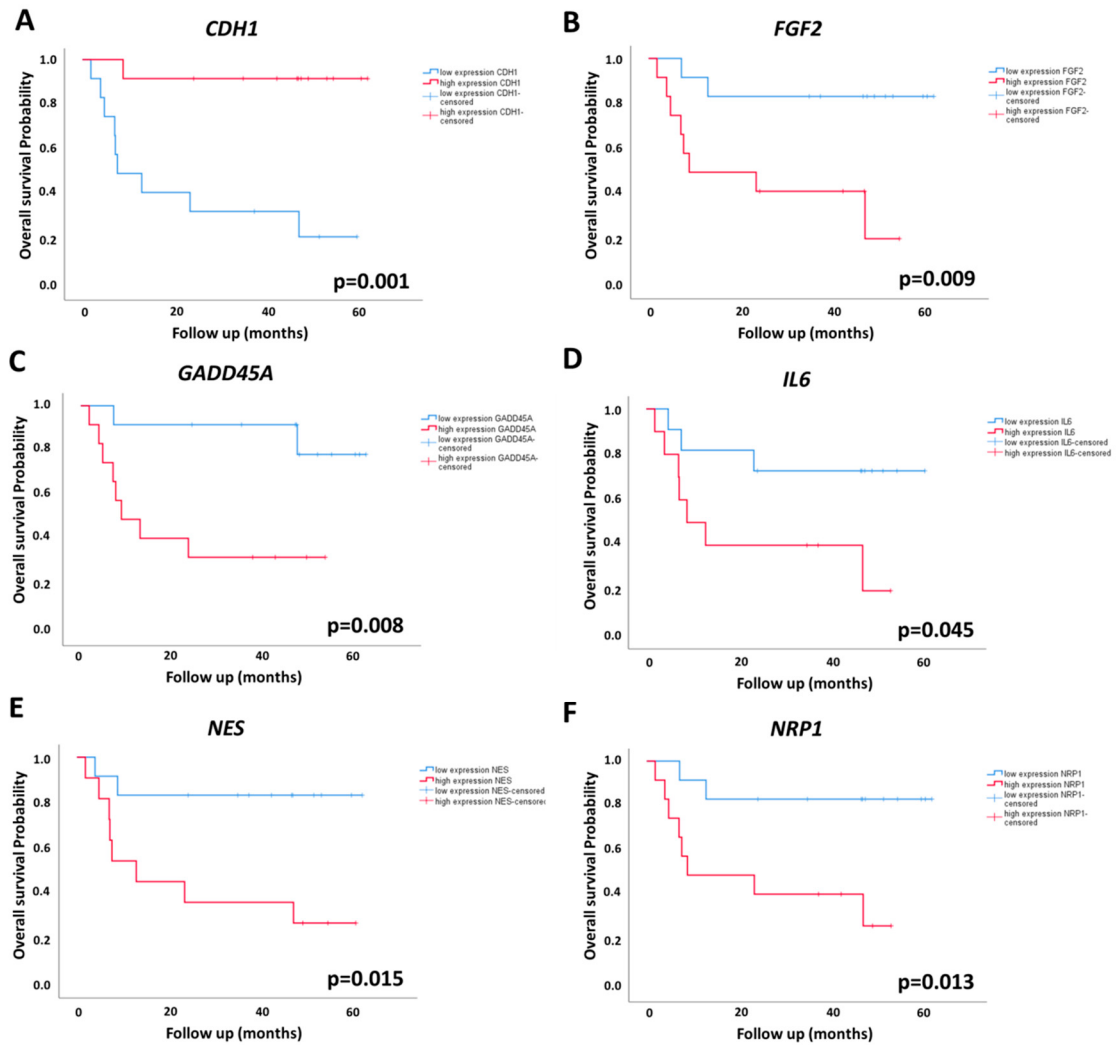

**Figure S7.** Overall survival (OS) analyses of penile cancer patients according to gene expression patterns. Kaplan-Meier curves show that low expression (defined as values above the -dCT median expression) of *CDH1* (A) and high expression levels of *FGF2* (B), *GADD45A* (C), *IL6* (D), *NES* (E), and *NRP1* (F) were associated with shorter OS.
